# Supplementary material for: CD81 Receptor Regions outside the Large Extracellular Loop Determine Hepatitis C Virus Entry into Hepatoma Cells
Source: MDPI journal article supplement (doi:10.3390/v10040207), 2018-04-20
Supplement: s1 [file s1]

## SUPPLEMENTAL TABLES AND REFERENCES

**Supplemental Table 1.** Residues in hCD81 and dmTSP96F backbones with critical functions.

| CD81 residue | CD81 domain              | Corresponding residue in dmTSP96F | Function                                   | Reference | conserved in dmTSP96F backbone |
|--------------|--------------------------|-----------------------------------|--------------------------------------------|-----------|--------------------------------|
| C6           | cytoplasmic N-terminus   | C6                                | palmitoylation                             | [1,2]     | yes                            |
| C9           | cytoplasmic N-terminus   | C9                                | palmitoylation                             | [1,2]     | yes                            |
| N18          | TM1                      | N18                               | cholesterol contact, hydrogen bonds        | [3]       | yes                            |
| F21          | TM1                      | F21                               | cholesterol contact                        | [3]       | yes                            |
| N43          | small extracellular loop | L43                               | predicted beta sheet, interaction with LEL | [4]       | no                             |
| L44          | small extracellular loop | n.a.                              | predicted beta sheet, interaction with LEL | [4]       | no                             |
| L45          | small extracellular loop | n.a.                              | predicted beta sheet, interaction with LEL | [4]       | no                             |
| Y46          | small extracellular loop | n.a.                              | predicted beta sheet, interaction with LEL | [4]       | no                             |
| L47          | small extracellular loop | n.a.                              | predicted beta sheet, interaction with LEL | [4]       | no                             |
| E48          | small extracellular loop | n.a.                              | predicted beta sheet, interaction with LEL | [4]       | no                             |
| I64          | TM2                      | V58                               | cholesterol contact                        | [3]       | hydrophobic                    |
| V68          | TM2                      | I62                               | cholesterol contact                        | [3]       | hydrophobic                    |

|      |                        |             |                                     |       |             |
|------|------------------------|-------------|-------------------------------------|-------|-------------|
| V71  | TM2                    | L65         | cholesterol contact                 | [3]   | hydrophobic |
| M72  | TM2                    | I66         | cholesterol contact                 | [3]   | hydrophobic |
| V75  | TM2                    | G69         | cholesterol contact                 | [3]   | hydrophobic |
| F94  | TM3                    | F88         | cholesterol contact                 | [3]   | yes         |
| L98  | TM3                    | I92         | cholesterol contact                 | [3]   | hydrophobic |
| L101 | TM3                    | V95         | cholesterol contact                 | [3]   | hydrophobic |
| K116 | TM3                    | K110        | salt bridge open conformation       | [3]   | yes         |
| D117 | TM3                    | D111        | salt bridge open conformation       | [3]   | yes         |
| E219 | TM4                    | S250 (E247) | cholesterol contact, hydrogen bonds | [3]   | no          |
| C228 | cytoplasmic C-terminus | C259        | palmitoylation                      | [1,2] | yes         |

**Supplemental Table 2.** Critical residues in the hCD81 LEL and their function.

| CD81 residue | CD81 domain | Function                 | Reference |
|--------------|-------------|--------------------------|-----------|
| Q125         | LEL         | predicted SEL contact    | [4]       |
| T149         | LEL         | predicted CDLN1 contact  | [5]       |
| E152         | LEL         | predicted CDLN1 contact  | [5]       |
| T153         | LEL         | predicted CDLN1 contact  | [5]       |
| T153         | LEL         | predicted SEL contact    | [4]       |
| C156         | LEL         | disulfite bond with C190 | [3]       |

|      |     |                                 |       |
|------|-----|---------------------------------|-------|
| C157 | LEL | disulfite bond with C175        | [3]   |
| L162 | LEL | HCV E2 binding                  | [6]   |
| T163 | LEL | HCV E2 binding                  | [7]   |
| L171 | LEL | HCV E2 binding                  | [8]   |
| L174 | LEL | HCV E2 binding                  | [8]   |
| C175 | LEL | disulfite bond with C157        | [3]   |
| I181 | LEL | HCV E2 binding                  | [8]   |
| I182 | LEL | HCV E2 binding                  | [6,8] |
| N184 | LEL | HCV E2 binding                  | [6]   |
| L185 | LEL | HCV E2 binding                  | [8]   |
| F186 | LEL | HCV E2 binding                  | [7,8] |
| K187 | LEL | HCV E2 binding                  | [8]   |
| E188 | LEL | HCV E2 binding                  | [8]   |
| D189 | LEL | HCV E2 binding                  | [8]   |
| C190 | LEL | disulfite bond with C156        | [3]   |
| D196 | LEL | HCV E2 binding                  | [7]   |
| D196 | LEL | salt bridge closed conformation | [3]   |
| K201 | TM4 | salt bridge closed conformation | [3]   |

## Bibliography

1. Delandre, C.; Penabaz, T. R.; Passarelli, A. L.; Chapes, S. K.; Clem, R. J. Mutation of juxtamembrane cysteines in the tetraspanin CD81 affects palmitoylation and alters interaction with other proteins at the cell surface. *Exp Cell Res* **2009**, *315*, 1953–1963.
2. Clark, K. L.; Oelke, A.; Johnson, M. E.; Eilert, K. D.; Simpson, P. C.; Todd, S. C. CD81 associates with 14-3-3 in a redox-regulated palmitoylation-dependent manner. *J Biol Chem* **2004**, *279*, 19401–19406.
3. Zimmerman, B.; Kelly, B.; McMillan, B. J.; Seegar, T. C.; Dror, R. O.; Kruse, A. C.; Blacklow, S. C. Crystal Structure of a Full-Length Human Tetraspanin Reveals a Cholesterol-Binding Pocket. *Cell* **2016**, *167*, 1041–1051.e11.
4. Seigneuret, M. Complete predicted three-dimensional structure of the facilitator transmembrane protein and hepatitis C virus receptor CD81: conserved and variable structural domains in the tetraspanin superfamily. *Biophys J* **2006**, *90*, 212–227.
5. Davis, C.; Harris, H. J.; Hu, K.; Drummer, H. E.; McKeating, J. A.; Mullins, J. G.; Balfe, P. In silico directed mutagenesis identifies the CD81/claudin-1 hepatitis C virus receptor interface. *Cell Microbiol* **2012**, *14*, 1892–1903.
6. Drummer, H. E.; Wilson, K. A.; Pountourios, P. Determinants of CD81 dimerization and interaction with hepatitis C virus glycoprotein E2. *Biochem Biophys Res Commun* **2005**, *328*, 251–257.
7. Kitadokoro, K.; Bordo, D.; Galli, G.; Petracca, R.; Falugi, F.; Abrignani, S.; Grandi, G.; Bolognesi, M. CD81 extracellular domain 3D structure: insight into the tetraspanin superfamily structural motifs. *EMBO J* **2001**, *20*, 12–18.
8. Chang, C. C.; Hsu, H. J.; Yen, J. H.; Lo, S. Y.; Liou, J. W. A Sequence in the loop domain of hepatitis C virus E2 protein identified in silico as crucial for the selective binding to human CD81. *PLoS ONE* **2017**, *12*, e0177383.
